# Supplementary material for: Identification of potential susceptibility genes in patients with Vestibular Migraine through whole exome sequencing
Source: Research Square preprint supplement (doi:10.21203/rs.3.rs-7361519/v1), 2025-08-21
Supplement: Supplementary file 1 [file cb3228df1c8227629d3ab7df.xlsx]

## Sheet: Sheet1
Gene	Chr.	Begin	End	Ref Transcript	Mutation Type	Nucleotide Changes	Amino Acid Changes	Effect	Mutation frequency		P value	OR	MutationTaster	Pathogenicity (ACMG)	Evidence (ACMG)
									Case (n=59)	Contral (n=280)
VWF	chr12	6132006	6132006	NM_000552.5	SNV	c.3438T>G	p.Tyr1146Ter	stopgain	100.00% (n=59)	0% (n=0)	1.55043e-67	66759	Disease causing	Likely pathogenic	PVS1,PM2
RSF1	chr11	77387961	77387961	NM_016578.3	SNV	c.3217G>T	p.Glu1073Ter	stopgain	57.63% (n=34)	1.07% (n=3)	2.81948e-27	107.269	Disease causing	Likely pathogenic	PVS1,PM2
NUP210L	chr1	154090209	154090209	NM_207308.2	SNV	c.1612G>T	p.Glu538Ter	stopgain	54.24% (n=32)	1.79% (n=5)	1.73497e-23	59.1983	Disease causing	Likely pathogenic	PVS1,PM2
RSF1	chr11	77387970	77387970	NM_016578.3	SNV	c.3208G>T	p.Glu1070Ter	stopgain	30.51% (n=18)	0% (n=0)	1.87703e-15	250.084	Disease causing	Likely pathogenic	PVS1,PM2
UGT1A1	chr2	234668894	234668894	NM_000463.3	insertion	c.-41_-40dup	/	unknown	23.73% (n=14)	0% (n=0)	5.74878e-12	178.78	-	Likely pathogenic	PS3,PM3
HLA-A	chr6	29910771	29910775	NM_002116.8	indel	c.311_315delinsT	p.Thr104IlefsTer17	frameshift	22.03% (n=13)	0% (n=0)	4.07413e-11	162.871	-	Likely pathogenic	PVS1,PM2
SEPTIN5	chr22	19709344	19709344	NM_002688.6	SNV	c.815-1G>C	/	splicing	20.34% (n=12)	0% (n=0)	2.83456e-10	147.632	Disease causing	Likely pathogenic	PVS1,PM2
NUP210L	chr1	154090200	154090200	NM_207308.2	SNV	c.1620+1G>T	/	splicing	16.95% (n=10)	0% (n=0)	1.30052e-08	119	Disease causing	Likely pathogenic	PVS1,PM2
RSF1	chr11	77387973	77387973	NM_016578.3	SNV	c.3205G>T	p.Glu1069Ter	stopgain	16.95% (n=10)	0% (n=0)	1.30052e-08	119	Disease causing	Likely pathogenic	PVS1,PM2
CNGA1	chr4	47945286	47945286	NM_001379270.1	SNV	c.349G>T	p.Glu117Ter	stopgain	32.20% (n=19)	5.00% (n=14%)	3.23716e-08	8.8493	Disease causing	Likely pathogenic	PVS1,PM2
JAKMIP2	chr5	147016563	147016563	NM_001270941.2	SNV	c.1579G>T	p.Glu527Ter	stopgain	13.56% (n=8)	0% (n=0)	5.57082e-07	92.5922	Disease causing	Likely pathogenic	PVS1,PM2
GGT1	chr22	25023870	25023871	NM_001288833.2	deletion	c.1261del	p.Met421TrpfsTer75	frameshift	11.86% (n=7)	0% (n=0)	3.55676e-06	80.1429	-	Likely pathogenic	PVS1,PM2
HLA-B	chr6	31324599	31324604	NM_005514.8	indel	c.204_209delinsGAGGC	p.Glu69ArgfsTer8	frameshift	10.17% (n=6)	0% (n=0)	2.23472e-05	68.1589	-	Likely pathogenic	PVS1,PM2
STRC	chr15	43906392	43906404	NM_153700.2	deletion	c.2303_2313+1del	/	splicing	8.47% (n=5)	0% (n=0)	0.000138221	56.6147	-	Likely pathogenic	PM2,PM3,PP3
TBC1D1	chr4	38016349	38016349	NM_015173.4	insertion	c.637dup	p.Arg213ProfsTer35	frameshift	8.47% (n=5)	0% (n=0)	0.000138221	56.6147	-	Likely pathogenic	PVS1,PM2
DNAH5	chr5	13845095	13845095	NM_001369.3	SNV	c.5122G>T	p.Glu1708Ter	stopgain	8.47% (n=5)	0% (n=0)	0.000138221	56.6147	Disease causing	Likely pathogenic	PVS1,PM2
INPPL1	chr11	71945570	71945570	NM_001567.4	SNV	c.2327-1G>C	/	splicing	6.78% (n=4)	0% (n=0)	0.000841894	45.4865	Disease causing	Pathogenic	PVS1,PM3,PM2
PHOX2A	chr11	71945570	71945570	NM_005169.4	SNV	c.*5223C>G	/	unknown	6.78% (n=4)	0% (n=0)	0.000841894	45.4865	Disease causing	Likely pathogenic	PM2,PM3,PP3
BPTF	chr17	65907223	65907223	NM_182641.4	SNV	c.3223G>T	p.Glu1075Ter	stopgain	6.78% (n=4)	0% (n=0)	0.000841894	45.4865	Disease causing	Likely pathogenic	PVS1,PM2
LONP1	chr19	5713146	5713146	NM_004793.4	SNV	c.637A>T	p.Arg213Ter	stopgain	6.78% (n=4)	0% (n=0)	0.000841894	45.4865	Disease causing	Likely pathogenic	PVS1,PM2,BP4
DNAH5	chr5	13845104	13845104	NM_001369.3	SNV	c.5115-2A>T	/	splicing	6.78% (n=4)	0% (n=0)	0.000841894	45.4865	Disease causing	Likely pathogenic	PVS1,PM2
MAP3K5	chr6	136944051	136944051	NM_005923.4	SNV	c.2085C>A	p.Tyr695Ter	stopgain	6.78% (n=4)	0% (n=0)	0.000841894	45.4865	Disease causing	Likely pathogenic	PVS1,PM2
ARID5B	chr10	63817029	63817029	NM_032199.3	SNV	c.1000G>T	p.Glu334Ter	stopgain	5.08% (n=3)	0% (n=0)	0.00505136	34.7522	Disease causing	Likely pathogenic	PVS1,PM2
ERBB2	chr17	37881641	37881641	NM_004448.4	SNV	c.2711A>T	p.Asp904Val	nonsynonymous	5.08% (n=3)	0% (n=0)	0.00505136	34.7522	Disease causing	Likely pathogenic	PM2,PP2,PP3
PRDM5	chr4	121719580	121719580	NM_018699.4	SNV	c.1031-1G>T	/	splicing	5.08% (n=3)	0% (n=0)	0.00505136	34.7522	Disease causing	Likely pathogenic	PVS1,PM2
PRRC2A	chr6	31601668	31601668	NM_004638.4	SNV	c.4621A>T	p.Arg1541Ter	stopgain	5.08% (n=3)	0% (n=0)	0.00505136	34.7522	Disease causing	Likely pathogenic	PVS1,PM2
GGT1	chr22	25010874	25010874	NM_001288833.2	SNV	c.295+1G>A	/	splicing	6.78% (n=4)	0.71% (n=2)	0.00953457	9.03243	Disease causing	Likely pathogenic	PVS1,PM2
IGSF3	chr1	117131400	117131400	NM_001007237.3	SNV	c.2356G>T	p.Glu786Ter	stopgain	3.39% (n=2)	0% (n=0)	0.0298651	24.3913	Disease causing_automatic	Likely pathogenic	PVS1,PM2
FMO3	chr1	171077325	171077327	NM_001002294.3	deletion	c.591_592del	p.Cys197Ter	stopgain	3.39% (n=2)	0% (n=0)	0.0298651	24.3913	-	Pathogenic	PVS1,PM3
NPR1	chr1	153661788	153661788	NM_000906.4	SNV	c.2688+1G>A	/	splicing	3.39% (n=2)	0% (n=0)	0.0298651	24.3913	Disease causing	Likely pathogenic	PVS1,PM2
PARK7	chr1	8045005	8045005	NM_007262.5	SNV	c.461C>A	p.Thr154Lys	nonsynonymous	3.39% (n=2)	0% (n=0)	0.0298651	24.3913	Disease causing	Pathogenic	PM2,PM3,PM5,PP3
KIAA0586	chr14	58896079	58896079	NM_001329943.3	SNV	c.200-2A>G	/	splicing	3.39% (n=2)	0% (n=0)	0.0298651	24.3913	Disease causing	Pathogenic	PVS1,PM2,PM3
ZFYVE26	chr14	68249722	68249722	NM_015346.4	SNV	c.4147C>T	p.Gln1383Ter	stopgain	3.39% (n=2)	0% (n=0)	0.0298651	24.3913	Disease causing	Pathogenic	PVS1,PM2,PM3
SLC12A3	chr16	56906680	56906680	NM_001126108.2	SNV	c.1077C>G	p.Asn359Lys	nonsynonymous	3.39% (n=2)	0% (n=0)	0.0298651	24.3913	Disease causing	Pathogenic	PP3,PP4,PM3,PM2
CNKSR1	chr1	26513901	26513901	NM_006314.3	SNV	c.1383-1G>C	/	splicing	3.39% (n=2)	0% (n=0)	0.0298651	24.3913	Disease causing	Likely pathogenic	PVS1,PM2
FCN3	chr1	27697465	27697465	NM_003665.4	SNV	c.394-2A>C	/	splicing	3.39% (n=2)	0% (n=0)	0.0298651	24.3913	Disease causing	Likely pathogenic	PVS1,PM2
SAMD11	chr1	878759	878759	NM_001385641.1	SNV	c.2178+2T>G	/	splicing	3.39% (n=2)	0% (n=0)	0.0298651	24.3913	Disease causing	Likely pathogenic	PVS1,PM2
AMPD3	chr11	10516542	10516542	NM_001025389.2	insertion	c.1225_1231dup	p.Tyr411Ter	stopgain	3.39% (n=2)	0% (n=0)	0.0298651	24.3913	-	Likely pathogenic	PVS1,PM2
ARRB1	chr11	74978748	74978748	NM_004041.5	SNV	c.1094-1G>T	/	splicing	3.39% (n=2)	0% (n=0)	0.0298651	24.3913	Disease causing	Likely pathogenic	PVS1,PM2
CEP295	chr11	93428771	93428771	NM_033395.2	SNV	c.1642G>T	p.Glu548Ter	stopgain	3.39% (n=2)	0% (n=0)	0.0298651	24.3913	Disease causing	Likely pathogenic	PVS1,PM2
OTOGL	chr12	80672807	80672807	NM_001378609.3	SNV	c.2790-1G>T	/	splicing	3.39% (n=2)	0% (n=0)	0.0298651	24.3913	Disease causing	Likely pathogenic	PVS1,PM2
TIMM9	chr14	58896079	58896079	NM_012460.4	SNV	c.-2273T>C	/	unknown	3.39% (n=2)	0% (n=0)	0.0298651	24.3913	Disease causing	Likely pathogenic	PS4,PM2,PP3
SECISBP2L	chr15	49304883	49304883	NM_001193489.2	SNV	c.1693G>T	p.Glu565Ter	stopgain	3.39% (n=2)	0% (n=0)	0.0298651	24.3913	Disease causing	Likely pathogenic	PVS1,PM2
CNOT1	chr16	58619364	58619364	NM_016284.5	SNV	c.684C>A	p.Tyr228Ter	stopgain	3.39% (n=2)	0% (n=0)	0.0298651	24.3913	Disease causing	Likely pathogenic	PVS1,PM2
MIEF2	chr17	18167252	18167253	NM_139162.4	deletion	c.540del	p.Pro181ArgfsTer98	frameshift	3.39% (n=2)	0% (n=0)	0.0298651	24.3913	-	Likely pathogenic	PVS1,PM2
NF1	chr17	29496986	29496986	NM_001042492.3	SNV	c.557A>T	p.Asp186Val	nonsynonymous	3.39% (n=2)	0% (n=0)	0.0298651	24.3913	Disease causing	Likely pathogenic	PS4,PM2,PM5,PP3
MEOX1	chr17	41738789	41738789	NM_004527.4	SNV	c.114C>A	p.Tyr38Ter	stopgain	3.39% (n=2)	0% (n=0)	0.0298651	24.3913	Disease causing	Likely pathogenic	PVS1,PM2,BP4
BPTF	chr17	65907220	65907220	NM_182641.4	SNV	c.3220G>T	p.Glu1074Ter	stopgain	3.39% (n=2)	0% (n=0)	0.0298651	24.3913	Disease causing	Likely pathogenic	PVS1,PM2
CARD14	chr17	78179446	78179446	NM_001366385.1	SNV	c.2686G>T	p.Glu896Ter	stopgain	3.39% (n=2)	0% (n=0)	0.0298651	24.3913	Disease causing	Likely pathogenic	PVS1,PM2
CIC	chr19	42799295	42799295	NM_001386298.1	insertion	c.7506_7507insGG	p.Pro2503GlyfsTer27	frameshift	3.39% (n=2)	0% (n=0)	0.0298651	24.3913	-	Likely pathogenic	PVS1,PM2
TNNT1	chr19	55657835	55657835	NM_003283.6	SNV	c.74-1G>C	/	splicing	3.39% (n=2)	0% (n=0)	0.0298651	24.3913	Disease causing	Likely pathogenic	PVS1,PM2
UNC80	chr2	210786299	210786299	NM_001371986.1	SNV	c.5419G>T	p.Glu1807Ter	stopgain	3.39% (n=2)	0% (n=0)	0.0298651	24.3913	Disease causing	Likely pathogenic	PVS1,PM2
UNC80	chr2	210786302	210786302	NM_001371986.1	SNV	c.5422G>T	p.Glu1808Ter	stopgain	3.39% (n=2)	0% (n=0)	0.0298651	24.3913	Disease causing	Likely pathogenic	PVS1,PM2
CFAP91	chr3	119459411	119459411	NM_033364.4	SNV	c.1549G>T	p.Glu517Ter	stopgain	3.39% (n=2)	0% (n=0)	0.0298651	24.3913	Disease causing	Likely pathogenic	PVS1,PM2
TSEN2	chr3	12574160	12574161	NM_025265.4	deletion	c.1339del	p.Glu447ArgfsTer2	frameshift	3.39% (n=2)	0% (n=0)	0.0298651	24.3913	-	Likely pathogenic	PVS1,PM2
NKTR	chr3	42659138	42659138	NM_005385.4	SNV	c.133+2T>A	/	splicing	3.39% (n=2)	0% (n=0)	0.0298651	24.3913	Disease causing	Likely pathogenic	PVS1,PM2
F12	chr5	176836045	176836045	NM_000505.4	SNV	c.115+2T>G	/	splicing	3.39% (n=2)	0% (n=0)	0.0298651	24.3913	Disease causing	Likely pathogenic	PVS1,PM2
AHI1	chr6	135768178	135768178	NM_001134831.2	SNV	c.1747G>T	p.Glu583Ter	stopgain	3.39% (n=2)	0% (n=0)	0.0298651	24.3913	Disease causing	Likely pathogenic	PVS1,PM2,BP4
MAP3K5	chr6	136944063	136944063	NM_005923.4	SNV	c.2073T>A	p.Tyr691Ter	stopgain	3.39% (n=2)	0% (n=0)	0.0298651	24.3913	Polymorphism automatic	Likely pathogenic	PVS1,PM2
LHFPL5	chr6	35773647	35773647	NM_182548.4	SNV	c.200A>G	p.Tyr67Cys	nonsynonymous	3.39% (n=2)	0% (n=0)	0.0298651	24.3913	Disease causing	Likely pathogenic	PM2,PM3,PM5,PP3
CD36	chr7	80302116	80302116	NM_001001548.2	SNV	c.1156C>T	p.Arg386Trp	nonsynonymous	3.39% (n=2)	0% (n=0)	0.0298651	24.3913	Disease causing	Likely pathogenic	PP3,PM3
RP1L1	chr8	10467526	10467527	NM_178857.6	deletion	c.4081del	p.Glu1361LysfsTer14	frameshift	3.39% (n=2)	0% (n=0)	0.0298651	24.3913	-	Likely pathogenic	PVS1,PM2
SLC26A7	chr8	92374603	92374603	NM_052832.4	insertion	c.1337dup	p.Phe447IlefsTer43	frameshift	3.39% (n=2)	0% (n=0)	0.0298651	24.3913	-	Likely pathogenic	PVS1,PM2
INPP5E	chr9	139324778	139324778	NM_019892.6	SNV	c.1753C>T	p.Arg585Cys	nonsynonymous	3.39% (n=2)	0% (n=0)	0.0298651	24.3913	Disease causing	Likely pathogenic	PM2,PM3,PM5,PP3
